# Supplementary material for: Few-layer MoS2 nanosheets vertically supported on Ti3C2-MXene sheets promoting lithium storage performance
Source: Royal Society of Chemistry journal article supplement (doi:10.1039/d3dt01963b), 2023-01-01
Supplement: d3dt01963b1.pdf [file d3dt01963b1.pdf]

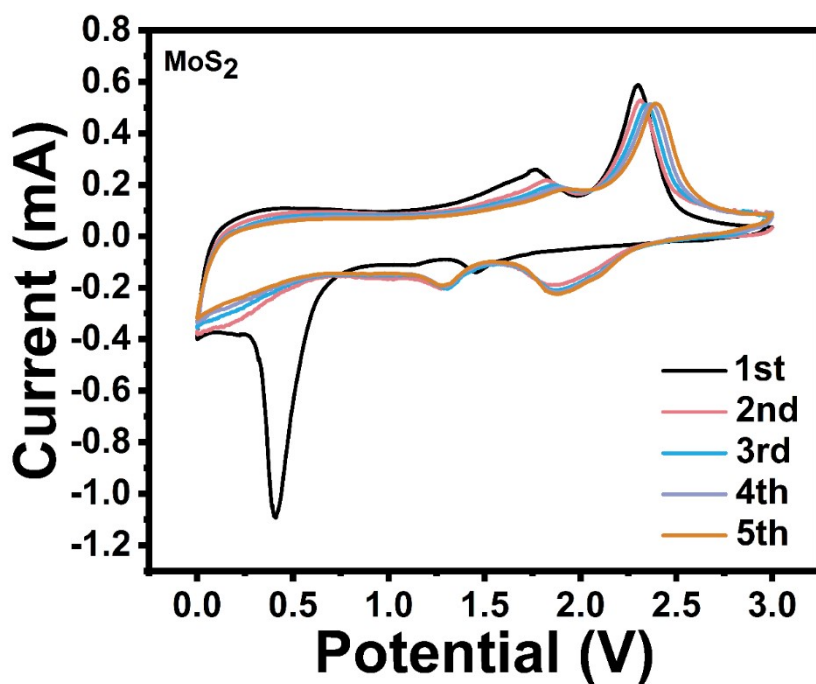

12

13 **Fig. S2** Initial five-cycle CV curves of MoS<sub>2</sub> at the scan rate of 0.1 mV s<sup>-1</sup>.

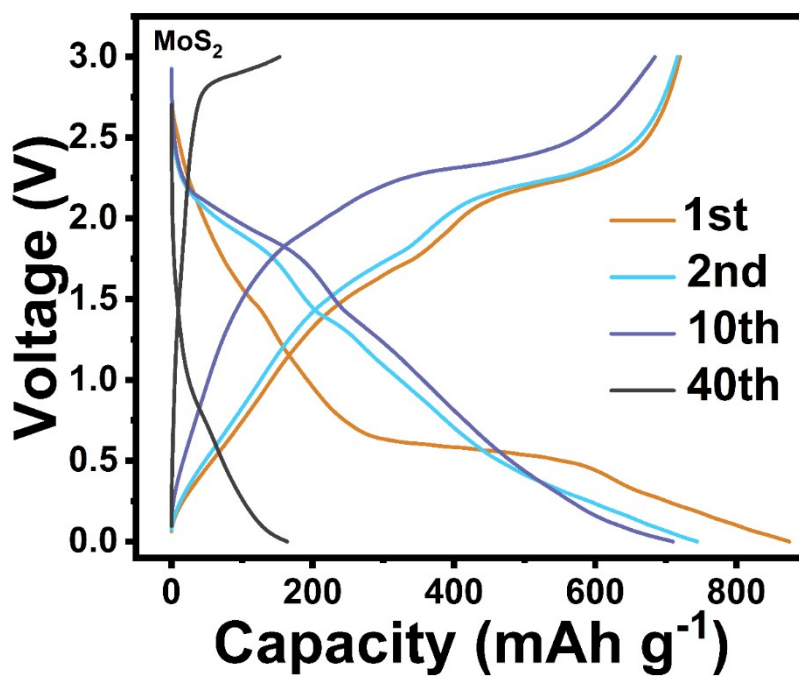

14

15 **Fig. S3** Initial five-cycle discharge/charge curves of MoS<sub>2</sub> at 200 mA g<sup>-1</sup>.
